# Supplementary figures and images for: The Phytochemical Profile and Anticancer Activity of Anthemis tinctoria and Angelica sylvestris Used in Estonian Ethnomedicine
Source: MDPI journal article supplement (doi:10.3390/plants11070994), 2022-04-05

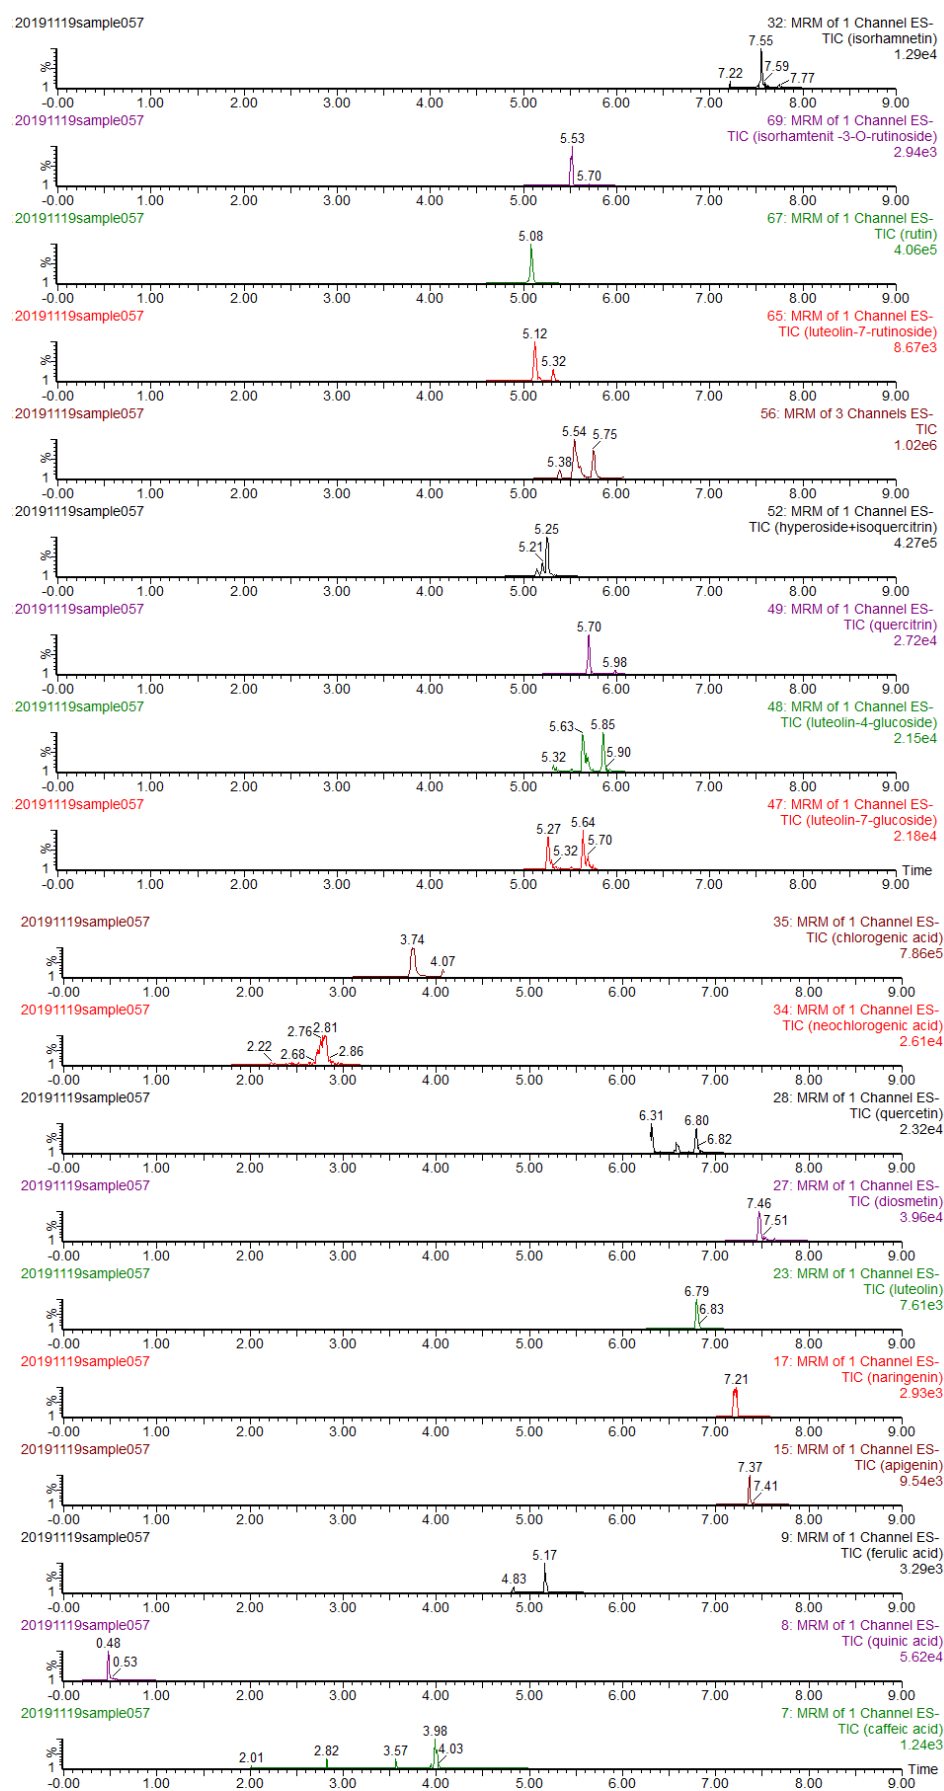

**Figure S1.** HPLC-chromatograms of aerial parts of *Anthemis tinctoria*.

Supplement: s1 [file s1]

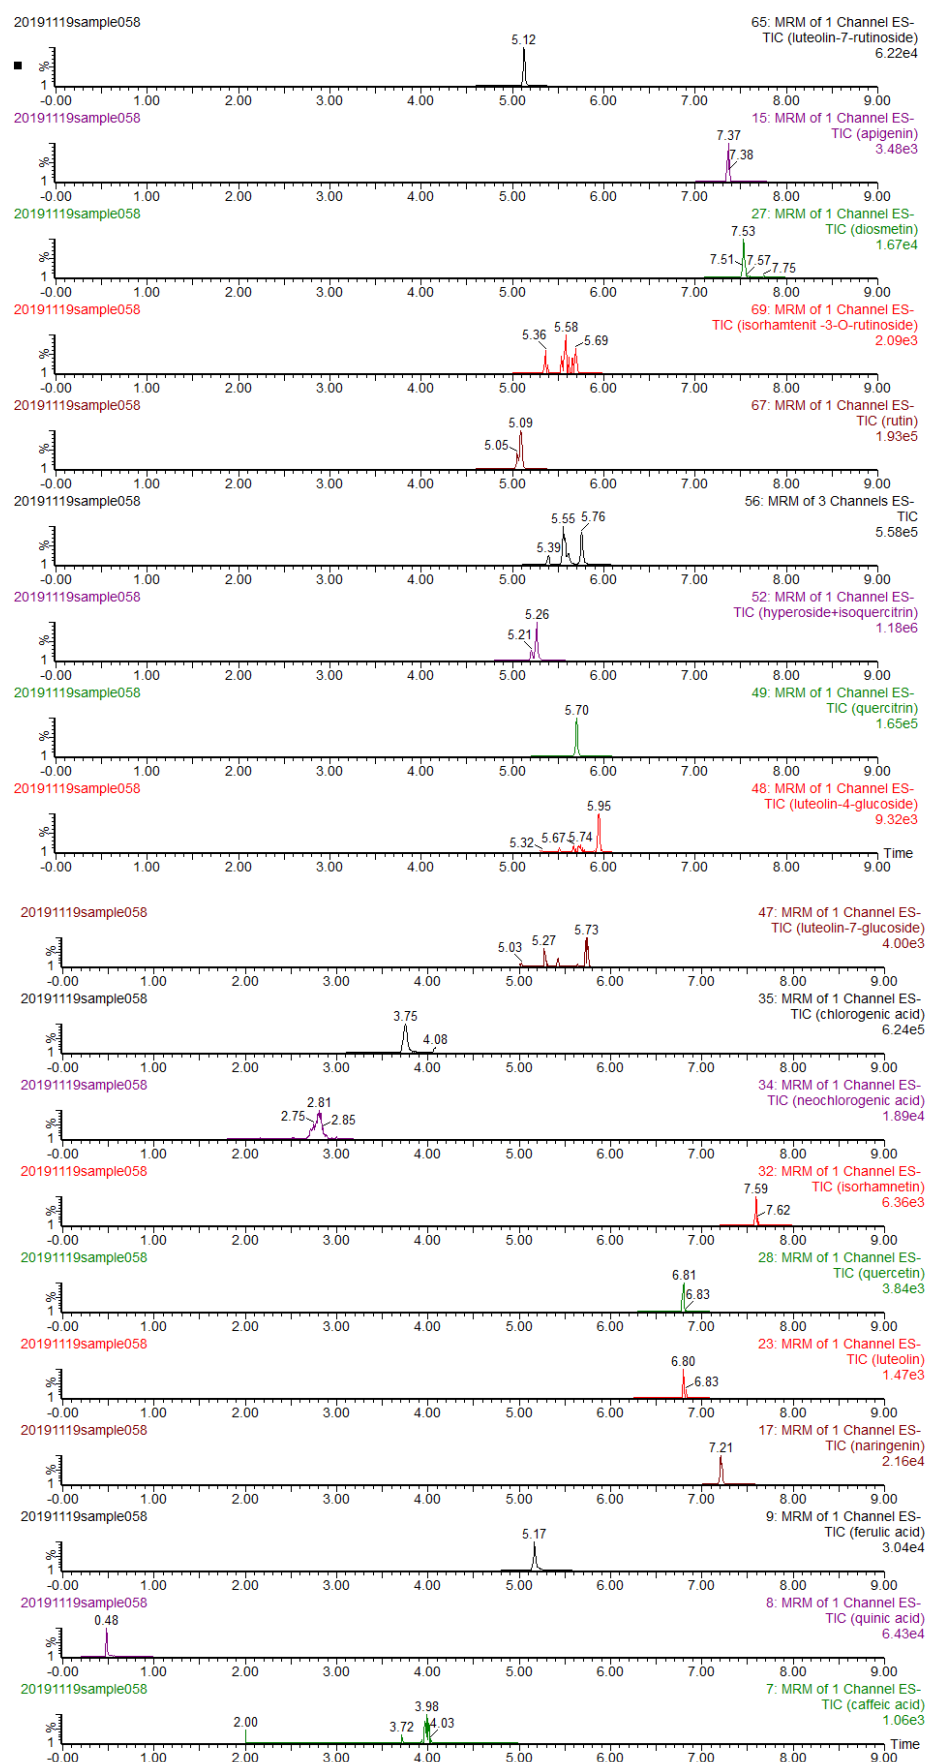

**Figure S2.** HPLC-chromatograms of aerial parts of *Angelica sylvestris*.

Supplement: s1 [file s1]

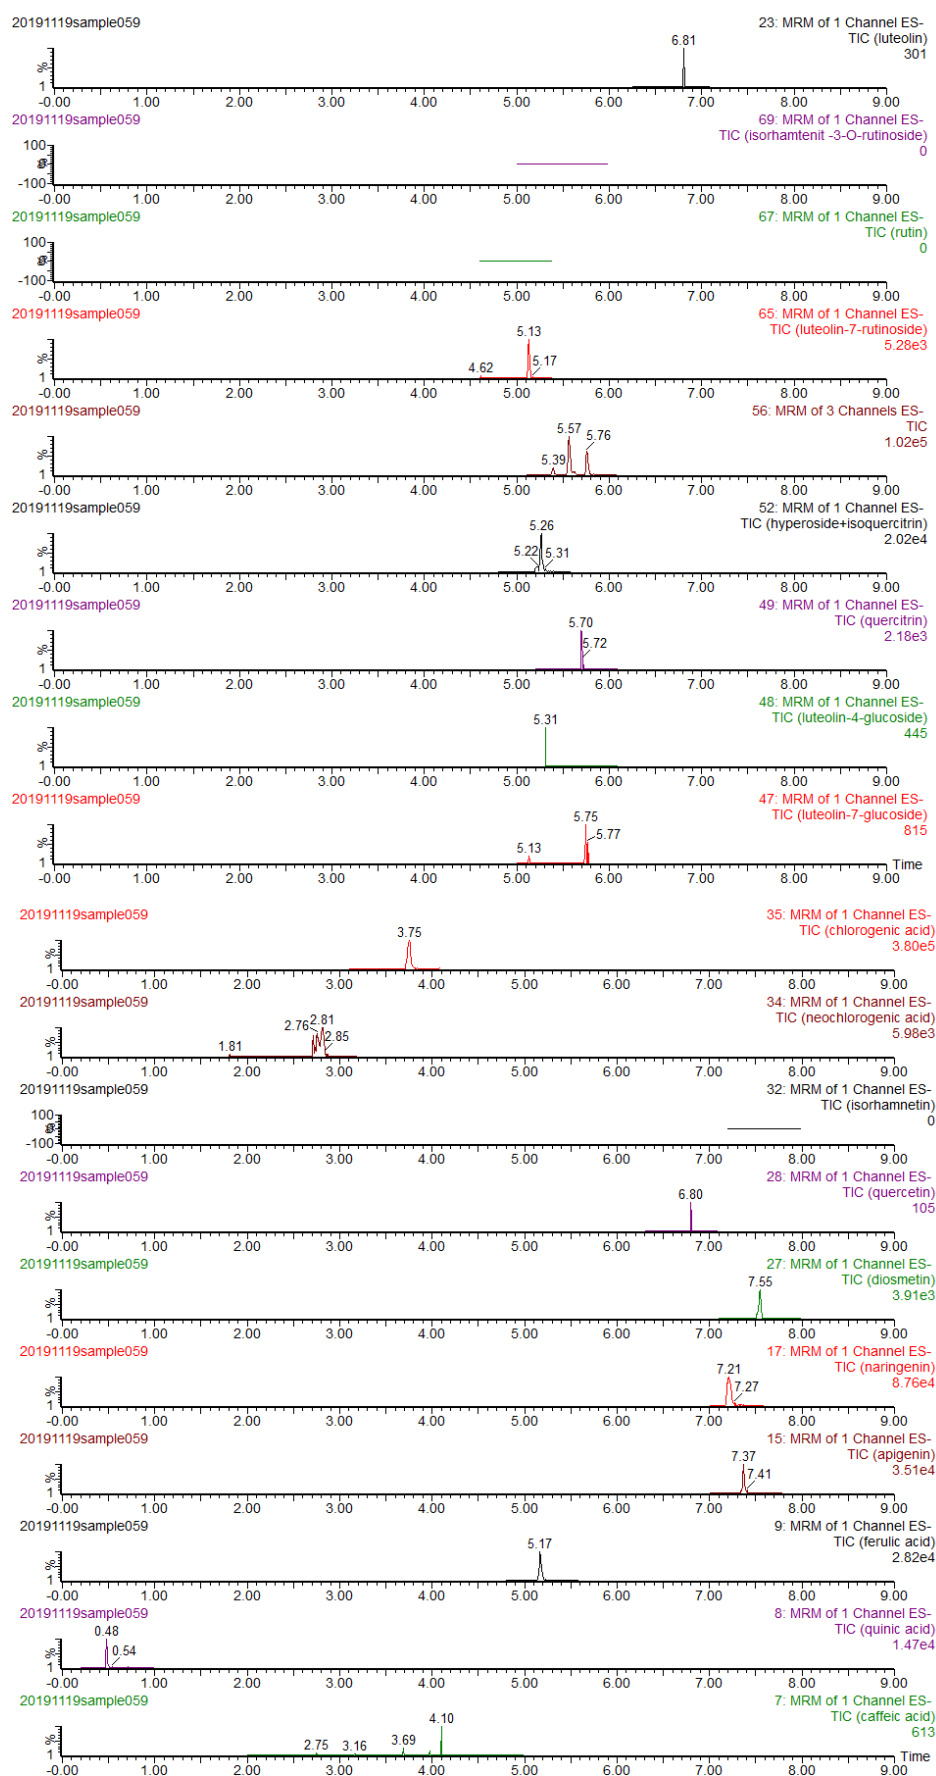

**Figure S3.** HPLC-chromatograms of roots of *Angelica sylvestris*.

Supplement: s1 [file s1]
